# Supplementary material
Source: publisher figshare collection journal article supplement (https://asha.figshare.com/articles/dataset/_/21957221)
Supplement: Supplementary file 1 [file 1]

**Supplemental Material S3.** Analysis of Swallowing Physiology: Events, Kinematics and Timing (ASPEKT) vallecular residue amounts between genders across age categories for each swallow task.

| Swallow Task    |               | Young<br>(21–39 years) |             | Middle<br>(40–59 years) |             | Old<br>(60+ years) |             |
|-----------------|---------------|------------------------|-------------|-------------------------|-------------|--------------------|-------------|
|                 |               | Males                  | Females     | Males                   | Females     | Males              | Females     |
| 5 ml thin       | <i>M (SD)</i> | 0.29 (0.89)            | 0.13 (0.58) | 0.12 (0.44)             | 0.00 (0.00) | 0.63 (0.90)        | 0.06 (0.27) |
|                 | 95% CI        | −0.03, 0.61            | −0.06, 0.33 | −0.03, 0.27             | n/a         | 0.17, 1.09         | −0.03, 0.15 |
|                 | <i>Mdn</i>    | 0.00                   | 0.00        | 0.00                    | 0.00        | 0.00               | 0.00        |
|                 | Range         | 0.00, 4.39             | 0.00, 2.82  | 0.00, 1.97              | n/a         | 0.00, 2.16         | 0.00, 1.34  |
|                 | <i>n</i>      | 33                     | 37          | 35                      | 35          | 17                 | 38          |
| Cup sip thin    | <i>M (SD)</i> | 0.55 (1.02)            | 0.07 (0.30) | 0.49 (1.05)             | 0.11 (0.27) | 1.15 (1.47)        | 0.76 (1.46) |
|                 | 95% CI        | 0.19, 0.91             | −0.03, 0.17 | 0.12, 0.85              | 0.01, 0.21  | 0.39, 1.90         | 0.28, 1.24  |
|                 | <i>Mdn</i>    | 0.00                   | 0.00        | 0.00                    | 0.00        | 0.91               | 0.00        |
|                 | Range         | 0.00, 3.52             | 0.00, 1.37  | 0.00, 3.97              | 0.00, 1.21  | 0.00, 4.99         | 0.00, 5.24  |
|                 | <i>n</i>      | 33                     | 37          | 35                      | 35          | 17                 | 38          |
| Sequential thin | <i>M (SD)</i> | 0.73 (1.60)            | 0.21 (0.61) | 0.67 (1.07)             | 0.15 (0.37) | 1.37 (1.45)        | 0.81 (1.66) |
|                 | 95% CI        | 0.16, 1.30             | 0.00, 0.42  | 0.29, 1.06              | 0.02, 0.27  | 0.62, 2.12         | 0.25, 1.36  |
|                 | <i>Mdn</i>    | 0.00                   | 0.00        | 0.00                    | 0.00        | 1.06               | 0.00        |
|                 | Range         | 0.00, 8.09             | 0.00, 2.30  | 0.00, 4.21              | 0.00, 1.22  | 0.00, 4.51         | 0.00, 7.29  |
|                 | <i>n</i>      | 33                     | 37          | 35                      | 35          | 17                 | 38          |
| 5 ml nectar     | <i>M (SD)</i> | 0.61 (1.33)            | 0.07 (0.27) | 0.53 (1.11)             | 0.15 (0.59) | 0.81 (1.18)        | 0.56 (1.28) |
|                 | 95% CI        | 0.13., 1.09            | −0.03, 0.16 | 0.15, 0.91              | −0.06, 0.35 | 0.20, 1.42         | 0.14, 0.98  |
|                 | <i>Mdn</i>    | 0.00                   | 0.00        | 0.00                    | 0.00        | 0.00               | 0.00        |
|                 | Range         | 0.00, 5.76             | 0.00, 1.18  | 0.00, 3.77              | 0.00, 3.20  | 0.00, 3.62         | 0.00, 4.70  |
|                 | <i>n</i>      | 33                     | 37          | 35                      | 35          | 17                 | 38          |
| Cup sip nectar  | <i>M (SD)</i> | 0.42 (0.85)            | 0.18 (0.51) | 0.68 (1.33)             | 0.15 (0.41) | 1.53 (1.68)        | 0.88 (1.74) |
|                 | 95% CI        | 0.11, 0.74             | 0.01, 0.35  | 0.21, 1.14              | 0.00, 0.29  | 0.66, 2.39         | 0.31, 1.46  |

|                   |               |             |             |             |             |             |             |
|-------------------|---------------|-------------|-------------|-------------|-------------|-------------|-------------|
|                   | <i>Mdn</i>    | 0.00        | 0.00        | 0.00        | 0.00        | 1.06        | 0.00        |
|                   | Range         | 0.00, 3.70  | 0.00, 2.20  | 0.00, 4.39  | 0.00, 1.98  | 0.00, 5.99  | 0.00, 7.47  |
|                   | <i>n</i>      | 33          | 37          | 35          | 35          | 17          | 38          |
| Sequential nectar | <i>M (SD)</i> | 0.75 (1.35) | 0.32 (0.76) | 1.02 (1.53) | 0.23 (0.50) | 2.13 (1.91) | 1.05 (1.56) |
|                   | 95% CI        | 0.27, 1.22  | 0.06, 0.58  | 0.47, 1.57  | 0.05, 0.40  | 1.15, 3.11  | 0.52, 1.57  |
|                   | <i>Mdn</i>    | 0.00        | 0.00        | 0.00        | 0.00        | 2.26        | 0.00        |
|                   | Range         | 0.00, 5.03  | 0.00, 3.65  | 0.00, 4.75  | 0.00, 2.49  | 0.00, 6.77  | 0.00, 5.85  |
|                   | <i>n</i>      | 33          | 37          | 35          | 35          | 17          | 38          |
| 5 ml honey        | <i>M (SD)</i> | 0.67 (1.31) | 0.32 (0.81) | 0.71 (1.53) | 0.14 (0.49) | 2.18 (2.51) | 0.98 (1.75) |
|                   | 95% CI        | 0.21, 1.13  | 0.05, 0.59  | 0.19, 1.24  | −0.03, 0.04 | 0.89, 3.47  | 0.40, 1.55  |
|                   | <i>Mdn</i>    | 0.00        | 0.00        | 0.00        | 0.00        | 1.80        | 0.00        |
|                   | Range         | 0.00, 6.15  | 0.00, 3.09  | 0.00, 7.25  | 0.00, 2.26  | 0.00, 8.42  | 0.00, 8.12  |
|                   | <i>n</i>      | 33          | 37          | 35          | 35          | 17          | 38          |
| 5 ml pudding      | <i>M (SD)</i> | 0.43 (1.34) | 0.01 (0.32) | 0.29 (0.76) | 0.08 (0.32) | 0.93 (1.35) | 0.22 (0.72) |
|                   | 95% CI        | −0.04, 0.91 | −0.03, 0.19 | 0.03, 0.55  | −0.03, 0.19 | 0.23, 1.62  | −0.02, 0.46 |
|                   | <i>Mdn</i>    | 0.00        | 0.00        | 0.00        | 0.00        | 0.00        | 0.00        |
|                   | Range         | 0.00, 6.41  | 0.00, 1.56  | 0.00, 3.44  | 0.00, 1.56  | 0.00, 3.64  | 0.00, 3.26  |
|                   | <i>n</i>      | 33          | 37          | 35          | 35          | 17          | 38          |
| Solid             | <i>M (SD)</i> | 0.06 (0.25) | 0.03 (0.21) | 0.34 (0.94) | 0.08 (0.33) | 0.88 (2.05) | 0.63 (1.52) |
|                   | 95% CI        | −0.03, 0.15 | −0.04, 0.10 | 0.01, 0.67  | −0.03, 0.19 | −0.17, 1.94 | 0.13, 1.14  |
|                   | <i>Mdn</i>    | 0.00        | 0.00        | 0.00        | 0.00        | 0.00        | 0.00        |
|                   | Range         | 0.00, 1.33  | 0.00, 1.26  | 0.00, 4.18  | 0.00, 1.41  | 0.00, 6.10  | 0.00, 7.07  |
|                   | <i>n</i>      | 33          | 37          | 35          | 35          | 17          | 38          |
