# Supplementary material
Source: publisher figshare collection journal article supplement (https://asha.figshare.com/articles/dataset/_/21957221)
Supplement: Supplementary file 2 [file 1]

**Supplemental Material S2.** Normalized Residue Ratio Scale (NRRS) pyriform sinus residue amounts between genders across age categories for each swallow task.

| Swallow Task    |               | Young<br>(21–39 years) |             | Middle<br>(40–59 years) |             | Old<br>(60+ years) |             |
|-----------------|---------------|------------------------|-------------|-------------------------|-------------|--------------------|-------------|
|                 |               | Males                  | Females     | Males                   | Females     | Males              | Females     |
| 5 ml thin       | <i>M (SD)</i> | 0.07 (0.04)            | 0.18 (0.12) | 0.20 (0.18)             | 0.00 (0.00) | 0.78 (0.37)        | 0.10 (0.09) |
|                 | 95% CI        | 0.00, 0.14             | −0.07, 0.43 | −0.16, 0.56             | n/a         | −0.01, 1.57        | −0.08, 0.28 |
|                 | <i>Mdn</i>    | 0.00                   | 0.00        | 0.00                    | 0.00        | 0.00               | 0.00        |
|                 | Range         | 0.00, 0.71             | 0.00, 3.54  | 0.00, 6.11              | n/a         | 0.00, 6.06         | 0.00, 3.35  |
|                 | <i>n</i>      | 33                     | 37          | 35                      | 35          | 17                 | 38          |
| Cup sip thin    | <i>M (SD)</i> | 0.40 (0.17)            | 0.13 (0.09) | 0.37 (0.16)             | 0.05 (0.04) | 1.40 (0.52)        | 0.67 (0.20) |
|                 | 95% CI        | 0.06, 0.74             | −0.06, 0.32 | 0.05, 0.69              | −0.03, 0.12 | 0.29, 2.51         | 0.27, 1.07  |
|                 | <i>Mdn</i>    | 0.00                   | 0.00        | 0.00                    | 0.00        | 0.00               | 0.00        |
|                 | Range         | 0.00, 4.14             | 0.00, 2.79  | 0.00, 4.14              | 0.00, 1.15  | 0.00, 8.20         | 0.00, 4.62  |
|                 | <i>n</i>      | 33                     | 37          | 35                      | 35          | 17                 | 38          |
| Sequential thin | <i>M (SD)</i> | 0.47 (0.17)            | 0.22 (0.12) | 0.51 (0.23)             | 0.12 (0.12) | 1.87 (0.65)        | 0.83 (0.34) |
|                 | 95% CI        | 0.11, 0.82             | −0.01, 0.46 | 0.04, 0.98              | −0.12, 0.35 | 0.49, 3.24         | 0.13, 1.52  |
|                 | <i>Mdn</i>    | 0.00                   | 0.00        | 0.00                    | 0.00        | 1.09               | 0.00        |
|                 | Range         | 0.00, 4.57             | 0.00, 2.74  | 0.00, 6.87              | 0.00, 4.05  | 0.00, 10.38        | 0.00, 11.05 |
|                 | <i>n</i>      | 33                     | 37          | 35                      | 35          | 17                 | 38          |
| 5 ml nectar     | <i>M (SD)</i> | 0.22 (0.75)            | 0.08 (0.08) | 0.36 (0.13)             | 0.01 (0.01) | 1.33 (0.56)        | 0.34 (0.13) |
|                 | 95% CI        | 0.07, 0.38             | −0.08, 0.24 | 0.09, 0.63              | −0.01, 0.03 | 0.15, 2.52         | 0.07, 0.61  |
|                 | <i>Mdn</i>    | 0.00                   | 0.00        | 0.00                    | 0.00        | 0.00               | 0.00        |
|                 | Range         | 0.00, 1.38             | 0.00, 2.80  | 0.00, 3.64              | 0.28        | 0.00, 8.32         | 0.00, 3.55  |
|                 | <i>n</i>      | 33                     | 37          | 35                      | 35          | 17                 | 38          |
| Cup sip nectar  | <i>M (SD)</i> | 0.32 (0.13)            | 0.16 (0.08) | 0.44 (0.88)             | 0.12 (0.07) | 1.52 (0.50)        | 0.46 (0.16) |
|                 | 95% CI        | 0.05, 0.59             | 0.00, 0.31  | 0.14, 0.75              | −0.02, 0.27 | 0.47, 2.57         | 0.14, 0.79  |

|                      |               |             |             |             |             |             |             |
|----------------------|---------------|-------------|-------------|-------------|-------------|-------------|-------------|
|                      | <i>Mdn</i>    | 0.00        | 0.00        | 0.00        | 0.00        | 0.00        | 0.00        |
|                      | Range         | 0.00, 3.54  | 0.00, 2.09  | 0.00, 3.24  | 0.00, 2.02  | 0.00, 6.46  | 0.00, 4.08  |
|                      | <i>n</i>      | 33          | 37          | 35          | 35          | 17          | 38          |
| Sequential<br>nectar | <i>M (SD)</i> | 0.50 (0.14) | 0.24 (0.11) | 0.64 (0.17) | 0.16 (0.10) | 1.63 (0.59) | 0.71 (0.19) |
|                      | 95% CI        | 0.21, 0.80  | 0.02, 0.46  | 0.30, 0.98  | −0.03, 0.36 | 0.37, 2.88  | 0.33, 1.09  |
|                      | <i>Mdn</i>    | 0.00        | 0.00        | 0.00        | 0.00        | 1.31        | 0.00        |
|                      | Range         | 0.00, 2.53  | 0.00, 2.83  | 0.00, 4.27  | 0.00, 3.02  | 0.00, 10.33 | 0.00, 4.52  |
|                      | <i>n</i>      | 33          | 37          | 35          | 35          | 17          | 38          |
| 5 ml honey           | <i>M (SD)</i> | 0.38 (0.13) | 0.18 (0.11) | 0.58 (0.11) | 0.10 (0.08) | 1.38 (0.34) | 0.76 (0.24) |
|                      | 95% CI        | 0.11, 0.65  | −0.04, 0.40 | 0.18, 0.99  | −0.07, 0.27 | 0.65, 2.11  | 0.28, 1.23  |
|                      | <i>Mdn</i>    | 0.00        | 0.00        | 0.00        | 0.00        | 1.26        | 0.00        |
|                      | Range         | 0.00, 3.51  | 0.00, 2.91  | 0.00, 4.97  | 0.00, 2.83  | 0.00, 3.84  | 0.00, 5.24  |
|                      | <i>n</i>      | 33          | 37          | 35          | 35          | 17          | 38          |
| 5 ml pudding         | <i>M (SD)</i> | 0.15 (0.08) | 0.00 (0.00) | 0.19 (0.08) | 0.03 (0.03) | 1.21 (0.41) | 0.34 (0.21) |
|                      | 95% CI        | 0.00, 0.31  | n/a         | 0.02, 0.35  | −0.03, 0.09 | 0.34, 2.09  | −0.07, 0.76 |
|                      | <i>Mdn</i>    | 0.00        | 0.00        | 0.00        | 0.00        | 0.00        | 0.00        |
|                      | Range         | 0.00, 1.89  | n/a         | 0.00, 1.95  | 0.00, 1.09  | 0.00, 4.98  | 0.00, 7.22  |
|                      | <i>n</i>      | 33          | 37          | 35          | 35          | 17          | 38          |
| Solid                | <i>M (SD)</i> | 0.06 (0.06) | 0.00 (0.00) | 0.34 (0.15) | 0.06 (0.48) | 0.81 (0.40) | 0.27 (0.12) |
|                      | 95% CI        | −0.06, 0.19 | n/a         | 0.03, 0.65  | −0.03, 0.16 | −0.04, 1.67 | 0.03, 0.51  |
|                      | <i>Mdn</i>    | 0.00        | 0.00        | 0.00        | 0.00        | 0.00        | 0.00        |
|                      | Range         | 0.00, 2.01  | n/a         | 0.00, 3.82  | 0.00, 1.55  | 0.00, 4.68  | 0.00, 2.79  |
|                      | <i>n</i>      | 33          | 37          | 35          | 35          | 17          | 38          |
