# Supplementary material
Source: publisher figshare collection journal article supplement (https://asha.figshare.com/articles/dataset/_/21957221)
Supplement: Supplementary file 3 [file 1]

**Supplemental Material S1.** Normalized Residue Ratio Scale (NRRS) vallecular residue amounts between genders across age categories for each swallow task.

| Swallow Task    |               | Young<br>(21–39 years) |             | Middle<br>(40–59 years) |             | Old<br>(60+ years) |             |
|-----------------|---------------|------------------------|-------------|-------------------------|-------------|--------------------|-------------|
|                 |               | Males                  | Females     | Males                   | Females     | Males              | Females     |
| 5 ml thin       | <i>M (SD)</i> | 0.02 (0.06)            | 0.01 (0.03) | 0.00 (0.01)             | 0.00 (0.00) | 0.02 (0.04)        | 0.00 (0.01) |
|                 | 95% CI        | 0.00, 0.04             | 0.00, 0.02  | 0.00, 0.01              | n/a         | 0.00, 0.04         | 0.00, 0.01  |
|                 | <i>Mdn</i>    | 0.00                   | 0.00        | 0.00                    | 0.00        | 0.00               | 0.00        |
|                 | Range         | 0.00, 0.21             | 0.00, 0.18  | 0.00, 0.06              | n/a         | 0.00, 0.13         | 0.00, 0.06  |
|                 | <i>n</i>      | 33                     | 37          | 35                      | 35          | 17                 | 38          |
| Cup sip thin    | <i>M (SD)</i> | 0.02 (0.06)            | 0.00 (0.01) | 0.02 (0.05)             | 0.00 (0.01) | 0.05 (0.09)        | 0.04 (0.07) |
|                 | 95% CI        | 0.00, 0.05             | 0.00, 0.00  | 0.00, 0.04              | 0.00, 0.01  | 0.00, 0.09         | 0.01, 0.06  |
|                 | <i>Mdn</i>    | 0.00                   | 0.00        | 0.00                    | 0.00        | 0.01               | 0.00        |
|                 | Range         | 0.00, 0.26             | 0.00, 0.04  | 0.00, 0.23              | 0.00, 0.02  | 0.00, 0.35         | 0.00, 0.25  |
|                 | <i>n</i>      | 33                     | 37          | 35                      | 35          | 17                 | 38          |
| Sequential thin | <i>M (SD)</i> | 0.05 (0.15)            | 0.01 (0.03) | 0.02 (0.05)             | 0.01 (0.02) | 0.05 (0.08)        | 0.04 (0.08) |
|                 | 95% CI        | −0.01, 0.10            | 0.00, 0.20  | 0.01, 0.04              | 0.00, 0.02  | 0.01, 0.09         | 0.01, 0.07  |
|                 | <i>Mdn</i>    | 0.00                   | 0.00        | 0.00                    | 0.00        | 0.02               | 0.00        |
|                 | Range         | 0.00, 0.81             | 0.00, 0.12  | 0.00, 0.22              | 0.00, 0.09  | 0.00, 0.27         | 0.00, 0.36  |
|                 | <i>n</i>      | 33                     | 37          | 35                      | 35          | 17                 | 38          |
| 5 ml nectar     | <i>M (SD)</i> | 0.04 (0.12)            | 0.00 (0.01) | 0.09 (0.42)             | 0.01 (0.03) | 0.04 (0.08)        | 0.03 (0.08) |
|                 | 95% CI        | 0.00, 0.09             | 0.00, 0.01  | −0.06, 0.23             | 0.00, 0.02  | 0.00, 0.08         | 0.01, 0.06  |
|                 | <i>Mdn</i>    | 0.00                   | 0.00        | 0.00                    | 0.00        | 0.00               | 0.00        |
|                 | Range         | 0.00, 0.55             | 0.00, 0.06  | 0.00, 2.46              | 0.00, 0.14  | 0.00, 0.23         | 0.00, 0.32  |
|                 | <i>n</i>      | 33                     | 37          | 35                      | 35          | 17                 | 38          |
| Cup sip nectar  | <i>M (SD)</i> | 0.03 (0.07)            | 0.01 (0.04) | 0.03 (0.06)             | 0.00 (0.01) | 0.08 (0.12)        | 0.05 (0.12) |
|                 | 95% CI        | 0.00, 0.05             | 0.00, 0.03  | 0.01, 0.05              | 0.00, 0.01  | 0.02, 0.14         | 0.01, 0.09  |

|                   |               |             |             |             |             |             |             |
|-------------------|---------------|-------------|-------------|-------------|-------------|-------------|-------------|
|                   | <i>Mdn</i>    | 0.00        | 0.00        | 0.00        | 0.00        | 0.03        | 0.00        |
|                   | Range         | 0.00, 0.36  | 0.00, 0.22  | 0.00, 0.23  | 0.00, 0.07  | 0.00, 0.45  | 0.00, 0.54  |
|                   | <i>n</i>      | 33          | 37          | 35          | 35          | 17          | 38          |
| Sequential nectar | <i>M (SD)</i> | 0.05 (0.12) | 0.02 (0.05) | 0.04 (0.08) | 0.01 (0.02) | 0.11 (0.13) | 0.06 (0.10) |
|                   | 95% CI        | 0.01, 0.09  | 0.00, 0.03  | 0.02, 0.07  | 0.00, 0.02  | 0.04, 0.17  | 0.02, 0.09  |
|                   | <i>Mdn</i>    | 0.00        | 0.00        | 0.00        | 0.00        | 0.06        | 0.00        |
|                   | Range         | 0.00, 0.46  | 0.00, 0.25  | 0.00, 0.31  | 0.00, 0.10  | 0.00, 0.50  | 0.00, 0.43  |
|                   | <i>n</i>      | 33          | 37          | 35          | 35          | 17          | 38          |
| 5 ml honey        | <i>M (SD)</i> | 0.04 (0.10) | 0.02 (0.04) | 0.03 (0.09) | 0.01 (0.03) | 0.13 (0.19) | 0.05 (0.11) |
|                   | 95% CI        | 0.00, 0.07  | 0.00, 0.03  | 0.00, 0.06  | 0.00, 0.02  | 0.03, 0.22  | 0.02, 0.09  |
|                   | <i>Mdn</i>    | 0.00        | 0.00        | 0.00        | 0.00        | 0.04        | 0.00        |
|                   | Range         | 0.00, 0.52  | 0.00, 0.19  | 0.00, 0.45  | 0.00, 0.14  | 0.00, 0.72  | 0.00, 0.52  |
|                   | <i>n</i>      | 33          | 37          | 35          | 35          | 17          | 38          |
| 5 ml pudding      | <i>M (SD)</i> | 0.03 (0.10) | 0.00 (0.01) | 0.01 (0.04) | 0.00 (0.01) | 0.04 (0.07) | 0.01 (0.05) |
|                   | 95% CI        | −0.01, 0.06 | 0.00, 0.01  | 0.00, 0.02  | 0.00, 0.01  | 0.00, 0.08  | 0.00, 0.03  |
|                   | <i>Mdn</i>    | 0.00        | 0.00        | 0.00        | 0.00        | 0.00        | 0.00        |
|                   | Range         | 0.00, 0.41  | 0.00, 0.04  | 0.00, 0.19  | 0.00, 0.04  | 0.00, 0.24  | 0.00, 0.27  |
|                   | <i>n</i>      | 33          | 37          | 35          | 35          | 17          | 38          |
| Solid             | <i>M (SD)</i> | 0.00 (0.01) | 0.00 (0.02) | 0.01 (0.04) | 0.00 (0.01) | 0.06 (0.15) | 0.03 (0.09) |
|                   | 95% CI        | 0.00, 0.00  | 0.00, 0.01  | 0.00, 0.03  | 0.00, 0.01  | −0.02, 0.13 | 0.00, 0.06  |
|                   | <i>Mdn</i>    | 0.00        | 0.00        | 0.00        | 0.00        | 0.00        | 0.00        |
|                   | Range         | 0.00, 0.04  | 0.00, 0.09  | 0.00, 0.20  | 0.00, 0.05  | 0.00, 0.53  | 0.00, 0.44  |
|                   | <i>n</i>      | 33          | 37          | 35          | 35          | 17          | 38          |
