# Supplementary material
Source: publisher figshare collection journal article supplement (https://asha.figshare.com/articles/dataset/_/21957221)
Supplement: Supplementary file 5 [file 1]

**Supplemental Material S5.** Analysis of Swallowing Physiology: Events, Kinematics and Timing (ASPEKT) other residue amounts between genders across age categories for each swallow task.

| Swallow Task    |               | Young<br>(21–39 years) |             | Middle<br>(40–59 years) |             | Old<br>(60+ years) |             |
|-----------------|---------------|------------------------|-------------|-------------------------|-------------|--------------------|-------------|
|                 |               | Males                  | Females     | Males                   | Females     | Males              | Females     |
| 5 ml thin       | <i>M (SD)</i> | 0.18 (0.12)            | 0.08 (0.05) | 0.12 (0.11)             | 0.00 (0.00) | 0.06 (0.43)        | 0.04 (0.03) |
|                 | 95% CI        | –0.07, 0.42            | –0.03, 0.19 | –0.09, 0.34             | n/a         | –0.03, 0.15        | –0.02, 0.10 |
|                 | <i>Mdn</i>    | 0.00                   | 0.00        | 0.00                    | 0.00        | 0.00               | 0.00        |
|                 | Range         | 0.00, 3.76             | 0.00, 1.44  | 0.00, 3.66              | n/a         | 0.00, 0.54         | 0.00, 1.03  |
|                 | <i>n</i>      | 33                     | 37          | 35                      | 35          | 17                 | 38          |
| Cup sip thin    | <i>M (SD)</i> | 0.27 (0.11)            | 0.07 (0.05) | 0.40 (0.27)             | 0.01 (0.01) | 0.56 (0.28)        | 0.35 (0.14) |
|                 | 95% CI        | 0.06, 0.49             | –0.03, 0.17 | –0.18, 0.99             | –0.01, 0.03 | –0.03, 1.15        | 0.08, 0.63  |
|                 | <i>Mdn</i>    | 0.00                   | 0.00        | 0.00                    | 0.00        | 0.00               | 0.00        |
|                 | Range         | 0.00, 2.32             | 0.00, 1.59  | 0.00, 9.46              | 0.00, 0.27  | 0.00, 4.29         | 0.00, 3.10  |
|                 | <i>n</i>      | 33                     | 37          | 35                      | 35          | 17                 | 38          |
| Sequential thin | <i>M (SD)</i> | 0.48 (0.18)            | 0.07 (0.03) | 0.34 (0.64)             | 0.17 (0.09) | 0.68 (0.22)        | 0.36 (0.13) |
|                 | 95% CI        | 0.10, 0.85             | 0.00, 0.14  | 0.03, 0.58              | –0.01, 0.35 | 0.22, 1.13         | 0.10, 0.62  |
|                 | <i>Mdn</i>    | 0.00                   | 0.00        | 0.00                    | 0.00        | 0.00               | 0.00        |
|                 | Range         | 0.00, 4.53             | 0.00, 0.88  | 0.00, 3.74              | 0.00, 2.10  | 0.00, 2.51         | 0.00, 3.22  |
|                 | <i>n</i>      | 33                     | 37          | 35                      | 35          | 17                 | 38          |
| 5 ml nectar     | <i>M (SD)</i> | 0.17 (0.76)            | 0.03 (0.03) | 0.24 (0.13)             | 0.01 (0.01) | 0.23 (0.13)        | 0.14 (0.07) |
|                 | 95% CI        | 0.02, 0.33             | –0.03, 0.10 | 0.03, 0.64              | –0.01, 0.03 | –0.04, 0.51        | 0.00, 0.28  |
|                 | <i>Mdn</i>    | 0.00                   | 0.00        | 0.00                    | 0.00        | 0.00               | 0.00        |
|                 | Range         | 0.00, 1.93             | 0.00, 1.10  | 0.00, 3.74              | 0.36        | 0.00, 1.62         | 0.00, 1.62  |
|                 | <i>n</i>      | 33                     | 37          | 35                      | 35          | 17                 | 38          |
| Cup sip nectar  | <i>M (SD)</i> | 0.29 (0.14)            | 0.06 (0.40) | 0.27 (0.13)             | 0.07 (0.07) | 0.39 (0.16)        | 0.36 (0.16) |
|                 | 95% CI        | 0.00, 0.59             | –0.02, 0.14 | 0.01, 0.53              | –0.07, 0.22 | 0.04, 0.73         | 0.04, 0.67  |

|                   |               |             |             |             |             |             |             |
|-------------------|---------------|-------------|-------------|-------------|-------------|-------------|-------------|
|                   | <i>Mdn</i>    | 0.00        | 0.00        | 0.00        | 0.00        | 0.00        | 0.00        |
|                   | Range         | 0.00, 3.01  | 0.00, 1.38  | 0.00, 2.77  | 0.00, 2.32  | 0.00, 1.87  | 0.00, 4.11  |
|                   | <i>n</i>      | 33          | 37          | 35          | 35          | 17          | 38          |
| Sequential nectar | <i>M (SD)</i> | 0.38 (0.16) | 0.15 (0.60) | 0.71 (0.24) | 0.17 (0.07) | 0.81 (0.30) | 0.59 (0.17) |
|                   | 95% CI        | 0.05, 0.71  | 0.03, 0.27  | 0.22, 1.20  | 0.02, 0.32  | 0.16, 1.45  | 0.41, 0.94  |
|                   | <i>Mdn</i>    | 0.00        | 0.00        | 0.00        | 0.00        | 0.00        | 0.00        |
|                   | Range         | 0.00, 4.10  | 0.00, 1.34  | 0.00, 6.64  | 0.00, 1.78  | 0.00, 4.02  | 0.00, 3.28  |
|                   | <i>n</i>      | 33          | 37          | 35          | 35          | 17          | 38          |
|                   | <i>M (SD)</i> | 0.32 (0.15) | 0.05 (0.03) | 0.46 (0.19) | 0.05 (0.41) | 0.53 (0.23) | 0.37 (0.13) |
| 5 ml honey        | 95% CI        | 0.13, 0.63  | −0.03, 0.11 | 0.08, 0.84  | −0.03, 0.14 | 0.05, 1.02  | 0.10, 0.64  |
|                   | <i>Mdn</i>    | 0.00        | 0.00        | 0.00        | 0.00        | 0.00        | 0.00        |
|                   | Range         | 0.00, 3.52  | 0.00, 1.19  | 0.00, 4.84  | 0.00, 1.41  | 0.00, 2.98  | 0.00, 3.26  |
|                   | <i>n</i>      | 33          | 37          | 35          | 35          | 17          | 38          |
|                   | <i>M (SD)</i> | 0.11 (0.06) | 0.00 (0.00) | 0.08 (0.06) | 0.00 (0.00) | 0.49 (0.23) | 0.20 (0.11) |
|                   | 95% CI        | 0.00, 0.23  | n/a         | −0.03, 0.19 | n/a         | 0.00, 0.99  | −0.02, 0.41 |
| 5 ml pudding      | <i>Mdn</i>    | 0.00        | 0.00        | 0.00        | 0.00        | 0.00        | 0.00        |
|                   | Range         | 0.00, 1.37  | n/a         | 0.00, 1.79  | n/a         | 0.00, 2.62  | 0.00, 2.84  |
|                   | <i>n</i>      | 33          | 37          | 35          | 35          | 17          | 38          |
|                   | <i>M (SD)</i> | 0.04 (0.04) | 0.00 (0.00) | 0.01 (0.01) | 0.05 (0.05) | 0.00 (0.00) | 0.04 (0.42) |
|                   | 95% CI        | −0.04, 0.12 | n/a         | −0.01, 0.02 | −0.05, 0.14 | n/a         | −0.04, 0.13 |
|                   | <i>Mdn</i>    | 0.00        | 0.00        | 0.00        | 0.00        | 0.00        | 0.00        |
| Solid             | Range         | 0.00, 1.26  | n/a         | 0.25        | 0.00, 1.59  | n/a         | 0.00, 1.55  |
|                   | <i>n</i>      | 33          | 37          | 35          | 35          | 17          | 38          |
